# Supplementary material
Source: publisher site journal article supplement (http://www.dovepress.com/get_supplementary_file.php?f=296031.xlsx)
Supplement: Supplementary file 1 [file get_supplementary_file.php]

## Sheet: Sheet1
Name: RCT-sensitive_IHC REG4 1：500 EDTA 20-5-20	A2	A3	A4	A5	A7	A8	A9	A10	A11	A13	A15	A16	B1	B2	B3	B4	B5	B6	B7	B10	B11	B12	B13	B14	B16	C2	C3	C4	C5	C6	C7	C8	C9	C11	C12	C13	C14	D1	D2	D3	D4	D5	D6	D7	D8	D9	D10	D11	D12
TMA	20	30	40	50	70	80	90	100	110	130	150	160	9	19	29	39	49	59	69	99	109	119	129	139	159	18	28	38	48	58	68	78	88	108	118	128	138	7	17	27	37	47	57	67	77	87	97	107	117
Total pixels	4721778	4553458	3128936	243786	6105935	9487372	5524661	5375038	1249266	5283483	12051503	5013510	5979633	3565608	5108061	3200827	461788	4334187	2150170	1682822	941013	3935361	3319220	3024330	2603182	6848280	1199629	4547212	3017763	1428595	6988348	4653069	1769609	426489	4216265	743794	5391862	2022598	2271745	4002514	175115	4940258	704349	658968	1429510	6978346	4648470	1998566	1821742
Negative pixels	157546	132709	21130	61206	131843	243348	97586	114479	44089	145086	68503	13631	197899	240751	312940	143702	20364	173814	142467	83545	105175	152148	57637	244864	17816	117354	320958	101294	288232	19808	189910	103062	215769	44972	111586	42664	93853	102184	66945	235207	75731	257273	308787	55576	41848	69195	164806	56987	202387
Weak-Positive pixels	4168585	4162406	2784019	152694	4758202	6253711	3007571	4730167	959805	4609756	9588187	3806113	4934215	2740654	3235013	2466879	318090	3535917	1673776	1097105	724823	2633380	2499303	1596822	1572054	6270025	849040	3973725	2564422	1328060	4724754	4048963	1388942	363597	3583080	656643	4469035	1186792	1878858	3262747	79797	3453372	343322	518846	1169641	3646682	3158979	1572041	1404534
Moderate-Positive pixels	390497	248197	312299	28469	1144397	2380497	1853968	503845	234743	504673	2222482	943434	801494	546267	1473339	512742	119803	600804	317285	468395	93431	1100762	721365	1067531	946686	445157	28291	451915	160172	78666	1550001	475708	161313	17062	497209	43762	755263	654896	309774	463924	15793	1187581	49807	74702	205547	2826105	1247821	347674	198661
Strong-Positive pixels	5150	10146	11488	1417	71493	609816	565536	26547	10629	23968	172331	250332	46025	37936	86769	77504	3531	23652	16642	33777	17584	49071	40915	115113	66626	15744	1340	20278	4937	2061	523683	25336	3585	858	24390	725	73711	78726	16168	40636	3794	42032	2433	9844	12474	436364	76864	21864	16160
Mean Density of all pixels	11.94	11.43	12.02	13.7	13.65	16.23	18.46	12.21	13.73	12.27	13.69	14.67	12.81	13.5	15.42	13.8	14.61	13.09	13.28	15.51	13.73	14.94	14.02	17.28	16.24	11.61	12.13	12.21	11.8	11.63	16.32	12.25	12.58	11.41	12.39	11.36	13.04	16.57	12.96	12.98	15.53	14.41	14.4	12.71	12.78	18.01	15.01	13.3	13.13
Mean Density of Negative pixels	17.47	19.94	20.61	17.09	24.06	18.74	20.37	19.67	22.28	19.77	20.4	23.76	19.65	18.21	19.99	19.71	19.83	19.84	18.52	25.02	23.63	18.75	20.52	22.59	23.34	19.53	16.84	20.92	17.74	28.26	18.92	20.18	18.18	16.69	19.53	16.74	18.06	22.57	21.89	19.22	18.23	18.1	17.41	16.52	19.38	22.7	19.52	21.21	17.95
Mean Density of Weak-Positive pixels	11.02	10.65	10.97	10.94	11.38	11.84	11.99	11.09	11.49	11.08	11.61	11.43	11.12	11.47	11.84	11.29	11.82	11.53	11.35	11.83	10.96	11.94	11.73	11.92	12.2	10.85	10.19	11.02	10.65	10.94	11.9	11	10.88	10.38	10.91	10.46	11.32	11.82	11.32	11.25	10.79	11.84	10.83	10.72	10.96	12.19	12.01	11.11	11.23
Mean Density of Moderate-Positive pixels	20.2	20.39	21.03	21.53	21.46	22.71	23.37	20.92	21.34	20.99	21.53	21.95	21.28	20.77	21.88	21.73	21.21	20.11	20.7	21.8	21.35	21.39	20.76	22.78	22.03	20.44	20.63	20.9	20.42	19.77	22.12	21.08	20.66	20.2	21.51	20.43	21.19	22.62	20.75	20.66	22.21	20.91	21.46	21.79	21.56	23	21.38	21.64	20.69
Mean Density of Strong-Positive pixels	42.77	50.59	42.95	45.63	46.47	48.77	48.1	44.39	43.36	44.99	47.9	52.95	45.02	52.79	45.42	48.7	49.4	55.41	50.52	46.55	57.7	44.48	52.31	45.26	45.46	42.89	49.85	44.56	49.07	59.83	53.61	43.57	43.99	48.95	42.88	54.76	49.08	46.09	49.98	55.39	58.88	51.06	44.6	48.39	44.29	46.49	45.58	43.15	53.28
Ratio of Negative pixels to total pixels（%）	3.34	2.91	0.68	25.11	2.16	2.56	1.77	2.13	3.53	2.75	0.57	0.27	3.31	6.75	6.13	4.49	4.41	4.01	6.63	4.96	11.18	3.87	1.74	8.1	0.68	1.71	26.75	2.23	9.55	1.39	2.72	2.21	12.19	10.54	2.65	5.74	1.74	5.05	2.95	5.88	43.25	5.21	43.84	8.43	2.93	0.99	3.55	2.85	11.11
Ratio of Strong-Positive pixels to total pixels（%）	0.11	0.22	0.37	0.58	1.17	6.43	10.24	0.49	0.85	0.45	1.43	4.99	0.77	1.06	1.7	2.42	0.76	0.55	0.77	2.01	1.87	1.25	1.23	3.81	2.56	0.23	0.11	0.45	0.16	0.14	7.49	0.54	0.2	0.2	0.58	0.1	1.37	3.89	0.71	1.02	2.17	0.85	0.35	1.49	0.87	6.25	1.65	1.09	0.89
Ratio of Moderate-Positive pixels to total pixels（%）	8.27	5.45	9.98	11.68	18.74	25.09	33.56	9.37	18.79	9.55	18.44	18.82	13.4	15.32	28.84	16.02	25.94	13.86	14.76	27.83	9.93	27.97	21.73	35.3	36.37	6.5	2.36	9.94	5.31	5.51	22.18	10.22	9.12	4	11.79	5.88	14.01	32.38	13.64	11.59	9.02	24.04	7.07	11.34	14.38	40.5	26.84	17.4	10.91
Ratio of Weak-Positive pixels to total pixels（%）	88.28	91.41	88.98	62.63	77.93	65.92	54.44	88	76.83	87.25	79.56	75.92	82.52	76.86	63.33	77.07	68.88	81.58	77.84	65.19	77.03	66.92	75.3	52.8	60.39	91.56	70.78	87.39	84.98	92.96	67.61	87.02	78.49	85.25	84.98	88.28	82.88	58.68	82.71	81.52	45.57	69.9	48.74	78.74	81.82	52.26	67.96	78.66	77.1
Ratio of all positive pixels to total pixels（%）	96.66	97.09	99.32	74.89	97.84	97.44	98.23	97.87	96.47	97.25	99.43	99.73	96.69	93.25	93.87	95.51	95.59	95.99	93.37	95.04	88.82	96.13	98.26	91.9	99.32	98.29	73.25	97.77	90.45	98.61	97.28	97.79	87.81	89.46	97.35	94.26	98.26	94.95	97.05	94.12	56.75	94.79	56.16	91.57	97.07	99.01	96.45	97.15	88.89
H-Score	105.152	102.982	110.04	87.734	118.925	135.382	152.265	108.232	116.963	107.713	120.733	128.532	111.634	110.696	126.114	116.372	123.063	110.943	109.678	126.884	102.489	126.599	122.462	134.814	140.801	105.246	75.827	108.603	96.084	104.409	134.45	109.098	97.328	93.858	110.303	100.343	115.001	135.111	112.112	107.745	70.105	120.533	63.922	105.89	113.197	152.013	126.605	116.733	101.57
Name: RCT-resistant_IHC REG4 1：500 EDTA 20-5-20	A2	A3	A4	A5	A8	A9	A10	A11	A12	A13	A14	A15	B1	B2	B3	B4	B5	B6	B7	B9	B11	B13	B14	B15	B16	C1	C2	C3	C5	C6	C7	C8	C9	C10	C11	C12	C13	C14	C15	C16	D3	D5	D7	D8	D11	D12	D13	D14	D15
TMA	136	127	118	109	82	73	64	55	46	37	28	19	146	137	128	119	110	101	92	74	56	38	29	20	11	147	138	129	111	102	93	84	75	66	57	48	39	30	21	12	130	112	94	85	58	49	40	31	22
Total pixels	1960433	3796026	698764	4961529	1329906	7041337	9112105	3551242	4689742	9501079	1004295	1214264	3068083	3140796	7251825	1690028	4968040	12348778	5950953	2665174	3853049	5227775	2281217	4202891	5224852	3522311	8085795	3001505	5732327	4632686	3253370	13319026	1410863	2596225	2832295	6804299	11367276	4559170	1905045	462018	1152760	4285282	2955192	2695840	4989888	2700449	12906291	1166959	2387365
Negative pixels	66733	67148	88135	79773	53342	154383	39516	94114	184170	83807	59203	24490	33093	57647	136160	39612	79567	115039	19488	59254	21751	52601	70924	293205	438557	39888	42871	31174	57740	36478	80733	38700	83127	49274	46126	41629	34089	29158	127457	207460	44029	114063	304094	30167	64036	52190	70916	37136	26537
Weak-Positive pixels	1641628	2801125	526816	3603753	1109916	6243066	5181519	2524853	2431652	5863998	765592	835775	2651630	2040726	6297882	1302204	4026346	6445561	3848594	1088849	2707836	4341297	1845799	3426613	3154672	2916223	5523464	1762885	4165687	2868789	2138878	5839947	1172055	2084933	2452808	3513294	6859465	4143897	1575766	225214	981390	3056210	1902825	2272632	4015568	2104842	7691160	727636	2092333
Moderate-Positive pixels	230610	891013	80041	1169197	153723	631883	3410086	846558	1755265	3223238	165708	328924	371904	922765	778299	335821	767950	4861028	1513322	1245684	1028396	793393	346100	467148	1568559	550583	2379179	1126985	1222368	1641454	866888	6100809	145720	377732	296435	2536140	3581968	369474	196362	28162	122105	711674	698432	378715	886555	504829	4704257	371684	263079
Strong-Positive pixels	21462	36740	3772	108806	12925	12005	480984	85717	318655	330036	13792	25075	11456	119658	39484	12391	94177	927150	569549	271387	95066	40484	18394	15925	63064	15617	140281	80461	286532	85965	166871	1339570	9961	84286	36926	713236	891754	16641	5460	1182	5236	403335	49841	14326	23729	38588	439958	30503	5416
Mean Density of all pixels	12.38	14.07	12.7	14.48	12.33	11.98	17.25	14.55	17.87	16.15	13.41	15.12	12.47	15.8	12.28	13.36	13.29	18.21	16.98	20.08	14.8	12.94	13.03	12.68	15.5	12.8	15.01	16.36	15.01	15.84	15.89	19.82	12.22	13.48	12.3	18.89	17.27	11.66	12.36	13.12	12.13	15.77	14.74	12.57	13.32	13.63	16.52	15.84	12.23
Mean Density of Negative pixels	14.87	17.3	15.99	18.89	17.13	17.46	19.98	17.74	17.61	18.2	18.42	31.41	15.86	18.57	16.98	17.81	18.59	18.81	23.4	16.44	22.37	19.23	18.26	17.73	18.38	18.84	18.04	20.07	21.35	18.64	19.74	21.92	17.12	19.28	16.12	21.28	19.8	18.62	18.27	14.8	16.06	19.58	15.96	18.41	17.98	19.07	17.47	21.65	19.56
Mean Density of Weak-Positive pixels	10.84	11.61	10.85	11.6	10.68	11.06	12.37	11.44	12.32	12.02	11.02	11.78	11.33	11.93	11.07	11.2	11.25	12.39	11.57	12.13	11.47	11.32	11.22	11.19	11.88	11.2	11.95	11.98	11.44	12.11	11.71	12.54	10.69	11	10.9	12.29	12.02	10.8	10.89	10.63	10.86	11.08	11.72	11.09	11.63	11.45	12.29	11.75	11.14
Mean Density of Moderate-Positive pixels	21.49	21.5	21.44	21.83	21.82	20.23	22.21	22.23	22.14	22.22	22	21.62	20.49	22.01	21.11	21.3	21.4	22.49	22.65	23.8	22.39	21.15	21.46	20.74	21.96	21.2	21.45	22.39	21.99	21.88	22.54	23.07	21.48	22.19	21.14	22.93	22.63	20.77	20.98	21.36	21.03	22.85	21.74	21.07	20.86	21.27	22.14	22.45	20.57
Mean Density of Strong-Positive pixels	46.98	43.22	43.12	46.91	47.28	44.56	48.36	45.67	50.57	45.47	45.36	48.6	44.16	48.98	44.25	44.01	50.23	48.56	53.36	45.93	44.38	45.19	43.75	45.76	42.95	41.85	47.04	44.77	53.29	44.63	47.57	46.97	45.3	49.9	51.01	48.23	49.22	45.73	43.69	44.02	45.03	53.13	44.59	44.18	42.97	47.36	45.37	44.55	44.34
Ratio of Negative pixels to total pixels（%）	3.4	1.77	12.61	1.61	4.01	2.19	0.43	2.65	3.93	0.88	5.89	2.02	1.08	1.84	1.88	2.34	1.6	0.93	0.33	2.22	0.56	1.01	3.11	6.98	8.39	1.13	0.53	1.04	1.01	0.79	2.48	0.29	5.89	1.9	1.63	0.61	0.3	0.64	6.69	44.9	3.82	2.66	10.29	1.12	1.28	1.93	0.55	3.18	1.11
Ratio of Strong-Positive pixels to total pixels（%）	1.09	0.97	0.54	2.19	0.97	0.17	5.28	2.41	6.79	3.47	1.37	2.07	0.37	3.81	0.54	0.73	1.9	7.51	9.57	10.18	2.47	0.77	0.81	0.38	1.21	0.44	1.73	2.68	5	1.86	5.13	10.06	0.71	3.25	1.3	10.48	7.84	0.37	0.29	0.26	0.45	9.41	1.69	0.53	0.48	1.43	3.41	2.61	0.23
Ratio of Moderate-Positive pixels to total pixels（%）	11.76	23.47	11.45	23.57	11.56	8.97	37.42	23.84	37.43	33.92	16.5	27.09	12.12	29.38	10.73	19.87	15.46	39.36	25.43	46.74	26.69	15.18	15.17	11.11	30.02	15.63	29.42	37.55	21.32	35.43	26.65	45.81	10.33	14.55	10.47	37.27	31.51	8.1	10.31	6.1	10.59	16.61	23.63	14.05	17.77	18.69	36.45	31.85	11.02
Ratio of Weak-Positive pixels to total pixels（%）	83.74	73.79	75.39	72.63	83.46	88.66	56.86	71.1	51.85	61.72	76.23	68.83	86.43	64.97	86.85	77.05	81.04	52.2	64.67	40.85	70.28	83.04	80.91	81.53	60.38	82.79	68.31	58.73	72.67	61.92	65.74	43.85	83.07	80.31	86.6	51.63	60.34	90.89	82.72	48.75	85.13	71.32	64.39	84.3	80.47	77.94	59.59	62.35	87.64
Ratio of all positive pixels to total pixels（%）	96.6	98.23	87.39	98.39	95.99	97.81	99.57	97.35	96.07	99.12	94.11	97.98	98.92	98.16	98.12	97.66	98.4	99.07	99.67	97.78	99.44	98.99	96.89	93.02	91.61	98.87	99.47	98.96	98.99	99.21	97.52	99.71	94.11	98.1	98.37	99.39	99.7	99.36	93.31	55.1	96.18	97.34	89.71	98.88	98.72	98.07	99.45	96.82	98.89
H-Score	110.549	123.639	99.921	126.343	109.492	107.122	147.547	126.016	147.09	139.99	113.352	129.202	111.79	135.164	109.944	118.993	117.648	153.449	144.244	164.881	131.061	115.719	113.675	104.896	124.041	115.386	132.364	141.87	130.314	138.356	134.423	165.63	105.849	119.144	111.445	157.625	146.901	108.194	104.19	61.704	107.681	132.77	116.717	113.992	117.435	119.62	142.718	133.896	110.362
[truncated: 80 more columns]
